# Supplementary material for: Estimation of Nocturnal Boundary Layer Height in the Central Amazon, Supported by Gas Concentration Profiles
Source: Copernicus journal article supplement (doi:10.5194/egusphere-2025-6531), 2026-01-08
Supplement: Supplementary file [file egusphere-2025-6531-AC2-supplement.pdf]

1 **Review of MS. MS No.: EGUSPHERE-2025-6531**

2 **Title:** Estimation of Nocturnal Boundary Layer Height in the Central Amazon, Supported by  
3 Gas Concentration Profiles

4  
5 Response (blue color) to anonymous **Referee #2** (black). The original manuscript was  
6 changed accordingly. Please note that all line numbers indicated in our responses refer to the  
7 tracked-changes version of the revised manuscript.

8  
9 **General comments**

10 This manuscript by Carla Souza et al. investigates the height of the nocturnal boundary layer  
11 ( $h_n$ ) above the central Amazon using micrometeorological observations from the Amazon Tall  
12 Tower Observatory. By analyzing vertical profiles of turbulent sensible heat flux up to 300 m,  
13 the authors estimate  $h_n$  more directly than many previous studies that rely on indirect proxies.  
14 The analysis focuses on seasonal differences between wet and dry periods during one La Niña  
15 year and one El Niño year. The authors report substantial variability in nocturnal  
16 boundary layer height, with the largest values occurring during the wet season of the La Niña  
17 year (approximately  $270 \pm 40$  m) and the smallest during the dry season associated with El  
18 Niño (approximately  $100 \pm 27$  m). They further show that variations in  $h_n$  influence the vertical  
19 distribution of CO and CH<sub>4</sub>, with the boundary layer height acting as a barrier that can limit  
20 the exchange of air masses containing elevated trace gas concentrations. Overall, the study  
21 provides observational evidence of strong seasonal and interannual variability in the nocturnal  
22 boundary layer over the Amazon and highlights implications for the representation of boundary  
23 layer processes and trace-gas transport in atmospheric models.

24  
25 The manuscript addresses an interesting and relevant topic; however, substantial revisions  
26 are required before it can be considered for publication. In its current form, the study would  
27 benefit from more in-depth investigation of the underlying physics and in-canopy processes.  
28 The analysis appears somewhat limited, and important mechanisms are not sufficiently  
29 explored or supported. Additionally, the manuscript is relatively short for a full paper, and  
30 several limitations of the study are not adequately discussed. Expanding on these aspects  
31 would improve the rigor and clarity of the work. While I find some of the ideas promising and  
32 appreciate the effort, there are a number of significant points that must be clarified. I would  
33 like to see detailed responses to the comments provided below, as they are essential for  
34 properly evaluating the study.

35  
36 Given the scope and depth of the current manuscript, I suggest that the work may be more  
37 suitable for consideration as a letter rather than a full research article. Below are my specific  
38 comments:

39  
40 We thank Reviewer #2 for the careful evaluation of our manuscript and for the constructive  
41 comments. We appreciate the reviewer's positive assessment of the relevance of the topic  
42 and of our observational approach to estimate the nocturnal boundary-layer height from  
43 vertical profiles of turbulent sensible heat flux.

44  
45 Following the reviewer's suggestions, we have revised the manuscript to strengthen the  
46 physical interpretation of the results and to better discuss the mechanisms controlling  $h_n$ . In  
47 particular, we expanded the discussion of thermal stability, turbulence, wind shear, radiative  
48 cooling, seasonal/interannual variability, and their implications for trace-gas transport. We also  
49 added supporting analyses and clarified the limitations of the study. Regarding the suggestion  
50 that the manuscript may be more suitable as a letter, we respectfully believe that the revised  
51 version is now appropriate as a full research article.

52  
53 All comments have been addressed below, and the manuscript has been revised accordingly.

54  
55 **Specific comments**

56  
57  
58  
59  
60  
61  
62  
63  
64  
65  
66  
67  
68  
69  
70  
71  
72  
73  
74  
75  
76  
77  
78  
79  
80  
81  
82  
83  
84  
85  
86  
87  
88  
89  
90  
91  
92  
93  
94  
95  
96  
97  
98  
99  
100  
101  
102  
103  
104  
105  
106  
107  
108  
109

• Lines 24-25: Attribute the reported differences of  $z_i$  between pastures and forests patches to the physical implications. It is also useful to define how  $z_i$  is calculated in the literature

We agree with the reviewer and updated the text in the revised manuscript as detailed below:

L26-30: “ estimated  $z_i$  from radiosonde data as the height of the main inversion layer, identified from the vertical profile of potential temperature. They showed that  $z_i$  values differ between pasture and forest areas, with a deeper boundary layer over pasture, up to ~1650 m, compared to forest, ~1100 m. This contrast is attributed to differences in surface energy partitioning, since pasture areas exhibit higher sensible heat fluxes and lower evapotranspiration compared to forests, leading to stronger thermal turbulence and enhanced boundary layer growth.”

• Line 35:  $z_i$  and not  $Z_i$

Thank you for pointing this out. This has been corrected in the revised manuscript (L39).

• Line 61: Again, mention how Mendonça et al. defined the calculation of  $z_i$

We clarified this point in the revised manuscript by rephrasing the sentence as follows:

L60-61: “These estimates are based on the height at which  $H$  falls below 5% of its near-surface value.”

• Line 82: Define the air temperature variable symbol ( $T$ ).

Thank you for pointing this out. This has been corrected in the revised manuscript (L89).

• Line 94: Is 30-min your Reynolds average? Any double rotation of the wind is attempted? Linear detrending?

We thank the reviewer for this question. The 30-minute subsets (18000 records) were not used as Reynolds averaging intervals, but for quality control (QC) procedures following Vickers and Mahrt (1997) and Zahn et al. (2016), including checks of data completeness, identification of error flags, spike detection and removal, and stationarity tests. After QC, the planar fit method (Wilczak et al., 2001) was used for tilt correction. For each six-month period, wind velocity components were used to estimate the anemometer tilt angles and define a mean streamline coordinate system. The tilt-corrected wind vectors were then rotated for each 30-min interval to align the horizontal wind component with the mean wind direction (Kaimal & Finnigan, 1994). Subsequently, linear detrending was applied to 5-minute time windows, within which turbulent fluctuations and statistics were calculated.

The following sentence has been updated to the revised manuscript:

L105-118: “As in other micrometeorological studies (Foken and Mauder, 2008; Starkenburg et al., 2016; Dias et al., 2023), the high frequency data were initially segmented into 30-minute intervals (totaling 18000 measurements) for the application of quality control (QC) procedures and tilt correction. QC was performed for each wind component and for the temperature measured by the sonic anemometers. The QC process included verification of record integrity, detection of error indicators, identification and removal of spikes, as well as the application of stationarity tests. For a detailed description of the quality control protocol adopted at the ATTO Site, it is recommended to consult Zahn et al. (2016) and Dias et al. (2023).

110 After QC, the planar fit method (Wilczak et al., 2001) was used for tilt correction. For each six-  
111 month period, wind velocity components were used to estimate the anemometer tilt angles  
112 and define a mean streamline coordinate system. The tilt-corrected wind vectors were then  
113 rotated for each 30-min interval to align the horizontal wind components with the mean wind  
114 direction (Kaimal and Finnigan, 1994). Subsequently, turbulence statistics were calculated  
115 over 5-minute windows using Reynolds averaging, after applying linear detrending within each  
116 window. This shorter time window reduces the influence of non-turbulent motions, which are  
117 relevant under stable boundary layer conditions (Sun et al., 2002; Oliveira et al., 2018).”  
118

119 • Line 100: 5-min turbulence statistics. clarify how does it differ from the above 30-min  
120 Reynolds average? Delineate clearly between QC and Reynolds averaging. Justify these  
121 choices.  
122

123 We thank the reviewer for these points. As clarified above, 30-minute blocks were used  
124 exclusively for QC procedures, whereas turbulence statistics were computed over 5-minute  
125 windows. This choice was made to better capture turbulent fluctuations while minimizing  
126 contamination from non-turbulent motions, which are relevant under stable boundary layer  
127 conditions (Sun et al., 2002; Oliveira et al., 2018). We have incorporated these clarifications  
128 into the revised manuscript, as detailed in our response to the previous comment (L101-L117  
129 this document).  
130

131 • Line 116: Justify these thresholds and the sensitivity to these thresholds.  
132

133 We thank the reviewer for the opportunity to clarify this point. The filtering thresholds were  
134 defined from the observed distribution of sensible heat flux (H) at each height range, while  
135 accounting for the expected decrease in flux magnitude with height above the canopy.  
136

137 To test the sensitivity of  $h_n$  to these thresholds, we applied two additional filtering scenarios.  
138 The baseline thresholds were  $-50$  to  $0 \text{ Wm}^{-2}$  for 50–81 m,  $-30$  to  $10 \text{ Wm}^{-2}$  for 100–151 m,  
139 and  $-20$  to  $10 \text{ Wm}^{-2}$  for 172–298 m (Scenario 3). The permissive scenario expanded these  
140 ranges to  $-60$  to  $20$ ,  $-45$  to  $25$ , and  $-35$  to  $15 \text{ Wm}^{-2}$  (Scenario 2) respectively. The restrictive  
141 scenario reduced them to  $-30$  to  $0$ ,  $-20$  to  $5$ , and  $-10$  to  $5 \text{ Wm}^{-2}$  (Scenario 1), respectively.  
142

143 The sensitivity test shows that the normalized heat-flux profiles and the estimated  $h_n$  are very  
144 similar across the three scenarios (Figure 1). The difference in estimated  $h_n$  was less than 15  
145 m. This indicates that the main results are robust and not sensitive to the specific filtering  
146 thresholds used.  
147

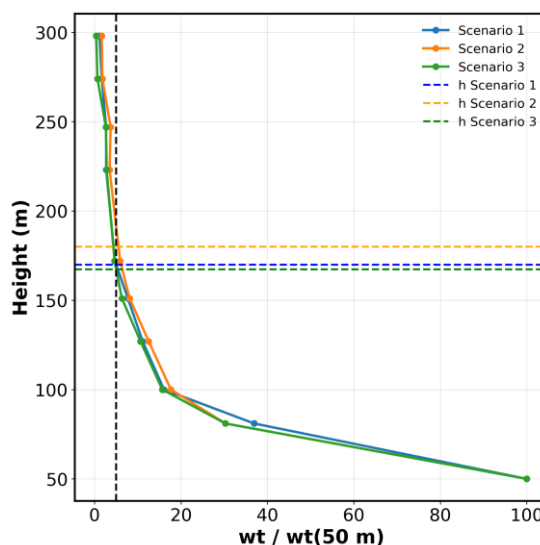

149 Figure 1. (Figure S1 in the new version of the manuscript) Sensitivity analysis of the filtering  
150 thresholds applied to the sensible heat flux ( $H$ ). The normalized profiles ( $H/H_{50} \times 100$ ) are  
151 shown for three scenarios: the original thresholds ( $-50$  to  $0$   $\text{W m}^{-2}$  for  $50$ – $81$  m,  $-30$  to  $10$   $\text{W}$   
152  $\text{m}^{-2}$  for  $100$ – $151$  m, and  $-20$  to  $10$   $\text{Wm}^{-2}$  for  $172$ – $298$  m; Scenario 3), a more permissive  
153 scenario ( $-60$  to  $20$ ,  $-45$  to  $25$ , and  $-35$  to  $15$   $\text{W m}^{-2}$ ; Scenario 2), and a morerestrictive  
154 scenario ( $-30$  to  $0$ ,  $-20$  to  $5$ , and  $-10$  to  $5$   $\text{Wm}^{-2}$ ; Scenario 1). Dashed horizontal lines indicate  
155 the corresponding  $h_n$  values.

156  
157 We added this justification and the sensitivity analysis to the revised manuscript and included  
158 the figure in the Supplementary Material.

159  
160 L 136-140: “To test the sensitivity of  $h_n$  to these filtering limits, we applied a more permissive  
161 scenario ( $-60$  to  $20$ ,  $-45$  to  $25$ , and  $-35$  to  $15$   $\text{W m}^{-2}$ ; Scenario 2) and a more restrictive  
162 scenario ( $-30$  to  $0$ ,  $-20$  to  $5$ , and  $-10$  to  $5$   $\text{W m}^{-2}$ ; Scenario 1) for the three height ranges.  
163 The normalized profiles were very similar, and the estimated  $h_n$  differed by less than  $15$  m  
164 among scenarios (Fig. S1), indicating that the results are robust to the selected thresholds.”

165  
166 • Line 142: There is another definition of  $h_n$  as the height at which TKE drops below a certain  
167 percentage of the measured TKE near the surface. Why this criterion is not adopted ? Also,  
168 how would the results change based on the latter? In this context and since TKE friction  
169 velocity a measure of the shear strength, did you look at Richardson number that shows the  
170 competition between buoyancy and shear?

171  
172 We appreciate the reviewer’s suggestion. Indeed, both the sensible heat flux ( $H$ ) and the  
173 turbulent kinetic energy (TKE) can be used to characterize turbulence. The  $H$  decreases with  
174 height and approaches zero at the level where turbulent mixing is suppressed, providing a  
175 direct indication of the NBL top (Fig. 2a). In contrast, although TKE also decreases with height,  
176 it does not become negligible at the NBL top (Fig. 2b), because non-turbulent motions can still  
177 contribute to velocity variances above this level (Acevedo et al., 2016).

178  
179 This limitation has already been evaluated for the ATTO site. Huitema et al. (2026), analyzing  
180 observations during the dry season of 2022, estimated  $h_n$  using different approaches and  
181 compared them against a reference  $h_n$  derived from potential temperature profiles. Using a  
182 TKE-based criterion defined as the height where TKE is reduced to 20% of its canopy-top  
183 value, they found that this approach overestimates  $h_n$  by approximately 18%. In addition, a  
184 Richardson number ( $Ri$ )-based criterion, defined as the lowest level where  $Ri \geq 0.25$ ,  
185 underestimates  $h_n$  by approximately 19% (their Fig. 2). For this reason, we adopt  $H$  as the  
186 primary criterion, as it better represents the upper limit of turbulent mixing in the NBL.

187

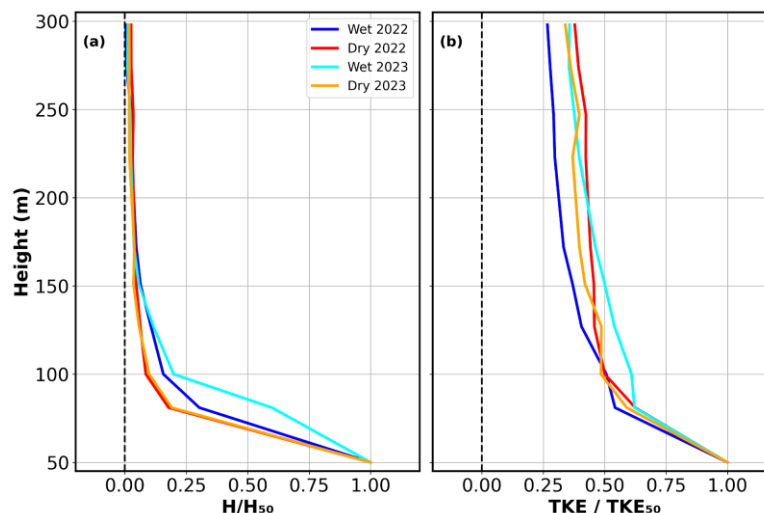

188

189 Figure 2. Average vertical profiles of normalized a) sensible heat flux (H) and b) turbulent  
190 kinetic energy (TKE) for wet and dry seasons in 2022 and 2023.

191  
192 • Line 159: Report the value  $\zeta = z/L$

193  
194 We thank the reviewer. In the revised manuscript, we have included quantitative values of the  
195 ( $z/L$ )

196  
197 L184: “The Wet period is less stable (smaller  $z/L = 2.15$ ), while the Dry period shows stronger  
198 stability ( $z/L = 3.10$ ).”

199  
200 • Line 163: After looking at figure 3, the results look so sensitive to the choice of 5%! Without  
201 loss of generality, if you opted to choose 6% for example, the reported values would drastically  
202 change. Any thoughts?

203  
204 We thank the reviewer for the opportunity to clarify the 5% threshold used to estimate  $h_n$ . The  
205 choice of the 5% threshold was based on previous studies (i.e. Nieuwstadt, 1984; Lenschow  
206 et al., 1988) since it reflects a point where turbulence, although still present, has significantly  
207 diminished relative to surface values (Stull 1988; Kaimal & Finnigan, 1994). Furthermore, this  
208 threshold offers a standardized method for defining  $h_n$ , facilitating comparisons across  
209 different regions. Figure 3 of this document shows a normalized vertical profile of the sensible  
210 heat flux ( $\overline{w'T'}$ ) using the flux value at 50 m as the reference (100%). The percentages on the  
211 x-axis represent the relative contribution of  $\overline{w'T'}$  at each height compared to 50 m. The results  
212 demonstrate that  $h_n$  estimates using the 3%, 5%, and 7% thresholds vary by less than 30  
213 meters highlighting the robustness of the method.

214

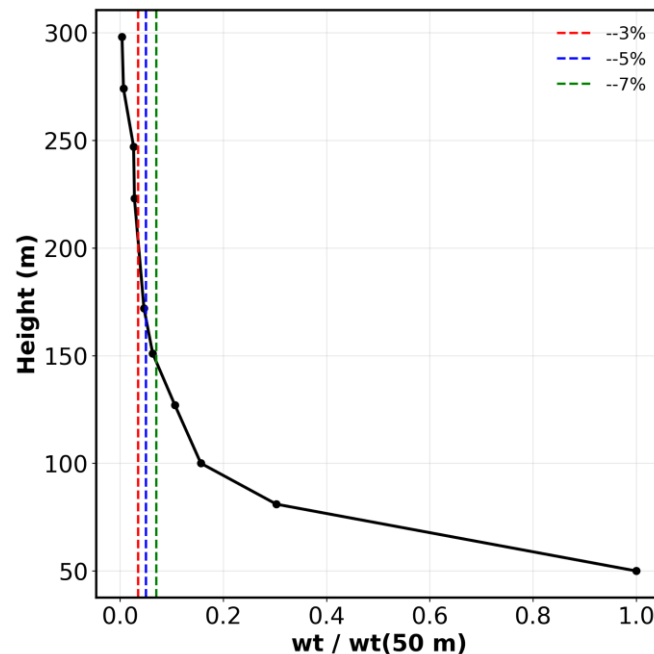

215  
216  
217 Figure 3. Normalized vertical profile of the sensible heat flux ( $\overline{w'T'}$ ). The dashed vertical lines  
218 indicate thresholds at 3% (red), 5% (blue), and 7% (green) of the flux.

219  
220 • Line 175: Compute the shear and relate to  $\zeta = z/L$

221  
222 We thank Reviewer #2 for this comment. The atmospheric stability parameter ( $\zeta = z/L$ ) was  
223 already included in the Supplementary Material (Figure S1 of the previous version of the  
224 manuscript), showing the hourly mean evolution of atmospheric stability during the wet and

225 dry seasons for both years analyzed. As shown in Figure S1, larger  $\zeta = z/L$  values were  
226 associated with stronger atmospheric stability and shallower NBL, particularly during the dry  
227 season.

228  
229 In addition, we expanded the analysis of the two case-study nights, including net radiation  
230 ( $R_n$ ) at 81 m, cloud fraction (%), vertical profile of the potential temperature ( $\theta$ ) difference  
231 relative to 298 m, and vertical wind shear ( $dU/dz$ ) for 18 and 25 August 2022 (Figure 4). To  
232 compute wind shear, third-order polynomial fits were applied to the wind speed profiles ( $U(z)$ ),  
233 from which analytical vertical derivatives were calculated. Cloud fraction was estimated from  
234 observations obtained by the Cloud Radar Profiler (METEK MIRA-35C) installed at the ATTO  
235 site. GOES-16 IR Channel 13 ( $10.3\ \mu\text{m}$ ) brightness temperature imagery was additionally used  
236 to illustrate cloud cover conditions during the two nights (Figures 5 and 6).

237  
238 The night of 18 August 2022 represents a strongly stratified and more decoupled case  
239 compared to 25 August 2022. Strong radiative cooling (Fig. 4a), reduced cloud occurrence  
240 (Fig. 4c and Fig. 5), and a pronounced vertical potential temperature gradient (Fig. 4e), were  
241 associated with a shallow  $h_n$ , mostly around 80–100 m. Despite the presence of wind shear  
242 at some levels, the strong stratification suggests that mechanically generated turbulence aloft  
243 was not efficiently coupled downward to the layer near the canopy. This behavior is consistent  
244 with a layered nocturnal structure in which the shallow surface-based layer remains isolated  
245 from the air above, similar to the regime described by Mahrt and Acevedo (2023). In contrast,  
246 the night of 25 August 2022 showed larger cloud cover (Fig. 4d and Fig. 6), reduced radiative  
247 cooling during the early night (Fig. 4b), and weaker thermal stratification (Fig. 4f). Wind shear  
248 extended to higher levels (Fig. 4h), reaching approximately 150–170 m, close to  $h_n$ . This  
249 suggests that mechanical forcing contributed to sustaining turbulence over a deeper layer  
250 under weaker stratification. Therefore, the differences between the two nights are interpreted  
251 as the result of the balance between radiative cooling, which enhances stratification and  
252 suppresses turbulence, and shear-generated mechanical turbulence, which can deepen or  
253 sustain the NBL when coupling is possible.

254  
255 We included this new analysis in Section 3.3 of the Results and in the new Section 4  
256 (Discussion) of the revised manuscript.

257  
258 L239–253: “To better identify the main drivers controlling the contrasting  $h_n$  behavior during  
259 the two case-study nights, we further analyzed  $R_n$  at 81m, cloud cover, the vertical profile of  $\theta$   
260 and windshear ( $dU/dz$ ) (Fig. 9). These variables provide complementary information on the  
261 local radiative forcing, cloud modulation of nocturnal cooling, thermal stratification, and  
262 mechanical turbulence generation. The night of 18 August 2022 was characterized by strong  
263 nocturnal radiative cooling (Fig. 9a), reduced cloud occurrence (Fig. 9c and Fig. S2), and a  
264 pronounced vertical potential temperature gradient (Figure 9e). These conditions indicate  
265 enhanced thermal stratification near the surface. Although wind shear was observed at some  
266 levels (Fig. 9g), the strong stratification suggests that mechanically generated turbulence aloft  
267 was not efficiently coupled downward toward the canopy. This supports the interpretation that  
268 the shallow  $h_n$  observed on 18 August 2022 reflects not only strong thermal stratification, but  
269 also canopy-induced suppression of vertical mixing near the forest top. This configuration is  
270 consistent with a shallow surface-based nocturnal layer that remained partly decoupled from  
271 the air above, similar to the layered nocturnal structure described by Mahrt and Acevedo  
272 (2023). In contrast, the night of 25 August 2022 showed larger cloud cover (Fig. 9d and  
273 Fig.S3), weaker radiative cooling during the early part of the night (Fig. 9b), and weaker  
274 thermal stratification (Fig. 9f). Wind shear extended to higher levels (Fig. 9h), reaching  
275 approximately 150–170 m, close to the observed  $h_n$ . This suggests that, under weaker  
276 stratification, mechanically generated turbulence was more effectively coupled over a deeper  
277 layer, contributing to the larger and more variable  $h_n$  observed during this night.”

278

279 L289-322: “The results presented here demonstrate that the nocturnal boundary-layer height  
280 ( $h_n$ ) above the central Amazon is strongly controlled by the interaction between nocturnal  
281 radiative cooling, atmospheric stability, cloud cover, and mechanically generated turbulence.  
282 Although previous Amazonian studies have primarily focused on the daytime evolution of the  
283 atmospheric boundary layer (Fisch et al., 2004; Carneiro and Fisch, 2020; Dias-Júnior et al.,  
284 2022), our results show that the nocturnal boundary layer also exhibits pronounced seasonal  
285 and interannual variability, with important implications for turbulence exchange and trace-gas  
286 transport above tropical forests.

287  
288 One of the clearest patterns observed in this study is the systematic reduction of  $h_n$  during the  
289 Dry season and during the El Niño year (2023). These periods were characterized by stronger  
290 nocturnal net radiative loss (Figure 2a) and enhanced atmospheric stability, reflected by larger  
291  $z/L$  values (Figure 2b) and a stronger thermal gradient (Fig. S6b, d). Under these conditions,  
292 turbulent exchange becomes increasingly suppressed, limiting the upward transport of  
293 sensible heat and favoring the formation of shallower nocturnal layers (Figures 4d and 5b). In  
294 contrast, wetter conditions, particularly during the Wet season of 2022, were associated with  
295 weaker radiative cooling (Figure 2a), reduced stability (Figure 2b), Weak thermal gradient(Fig  
296 S6a, c), and deeper nocturnal layers (Figures 4a and 5a). These findings reinforce the strong  
297 coupling between cloud cover, nocturnal cooling, and turbulence generation over the Amazon  
298 rainforest.

299  
300 The hourly evolution of  $h_n$  also reveals the importance of the temporal evolution of thermal  
301 stratification during the night. In all analyzed periods,  $h_n$  was generally larger at the beginning  
302 of the night and progressively decreased toward the early morning hours (Figure 5). This  
303 behavior is particularly evident during the Wet season of 2022, when the thermal gradient  
304 remained relatively weak during the first hours of the night (Figures 9e,f and S6a), allowing  
305 mechanically generated turbulence to sustain a deeper nocturnal boundary layer. As the night  
306 progressed, radiative cooling intensified the thermal gradients, suppressing turbulence and  
307 leading to a gradual collapse of  $h_n$ . This progressive reduction of turbulent mixing throughout  
308 the night is consistent with the classical evolution of stable nocturnal boundary layers  
309 described in previous studies (Mahrt, 1999; Sun et al., 2002).

310  
311 The results also demonstrate that the interaction between thermal stratification and  
312 mechanically generated turbulence is fundamental for understanding the nocturnal boundary-  
313 layer structure above the Amazon forest (Figure 9). The case studies revealed that low-level  
314 jets (LLJs) (Figure 7) and enhanced vertical wind shear (Figure 9 g,h) may sustain turbulence  
315 above the canopy, but the influence of this turbulence on the lower nocturnal boundary layer  
316 depends on the degree of vertical coupling between atmospheric layers. This interpretation is  
317 consistent with the conceptual framework proposed by Mahrt and Acevedo (2023), in which  
318 nocturnal boundary layers may deviate from a vertically monotonic structure and instead  
319 exhibit layered configurations composed of shallow surface-based layers, transition layers,  
320 and elevated turbulent regions.

321  
322 Our observations suggest that the forest canopy plays a key role in reinforcing this layered  
323 structure. Under strongly stable conditions, the canopy acts as a roughness and drag layer  
324 that attenuates momentum transfer toward the surface. Consequently, turbulence generated  
325 aloft by LLJs or strong wind shear may remain confined to elevated layers and may not  
326 efficiently penetrate downward through the canopy layer. This mechanism likely explains the  
327 shallow  $h_n$  observed on 18 August 2022, when strong thermal stratification and weak vertical  
328 coupling produced a highly decoupled nocturnal structure. In contrast, on 25 August 2022,  
329 weaker thermal stratification allowed mechanically generated turbulence to penetrate deeper  
330 into the lower nocturnal boundary layer, resulting in larger and more vertically connected  $h_n$   
331 values.”

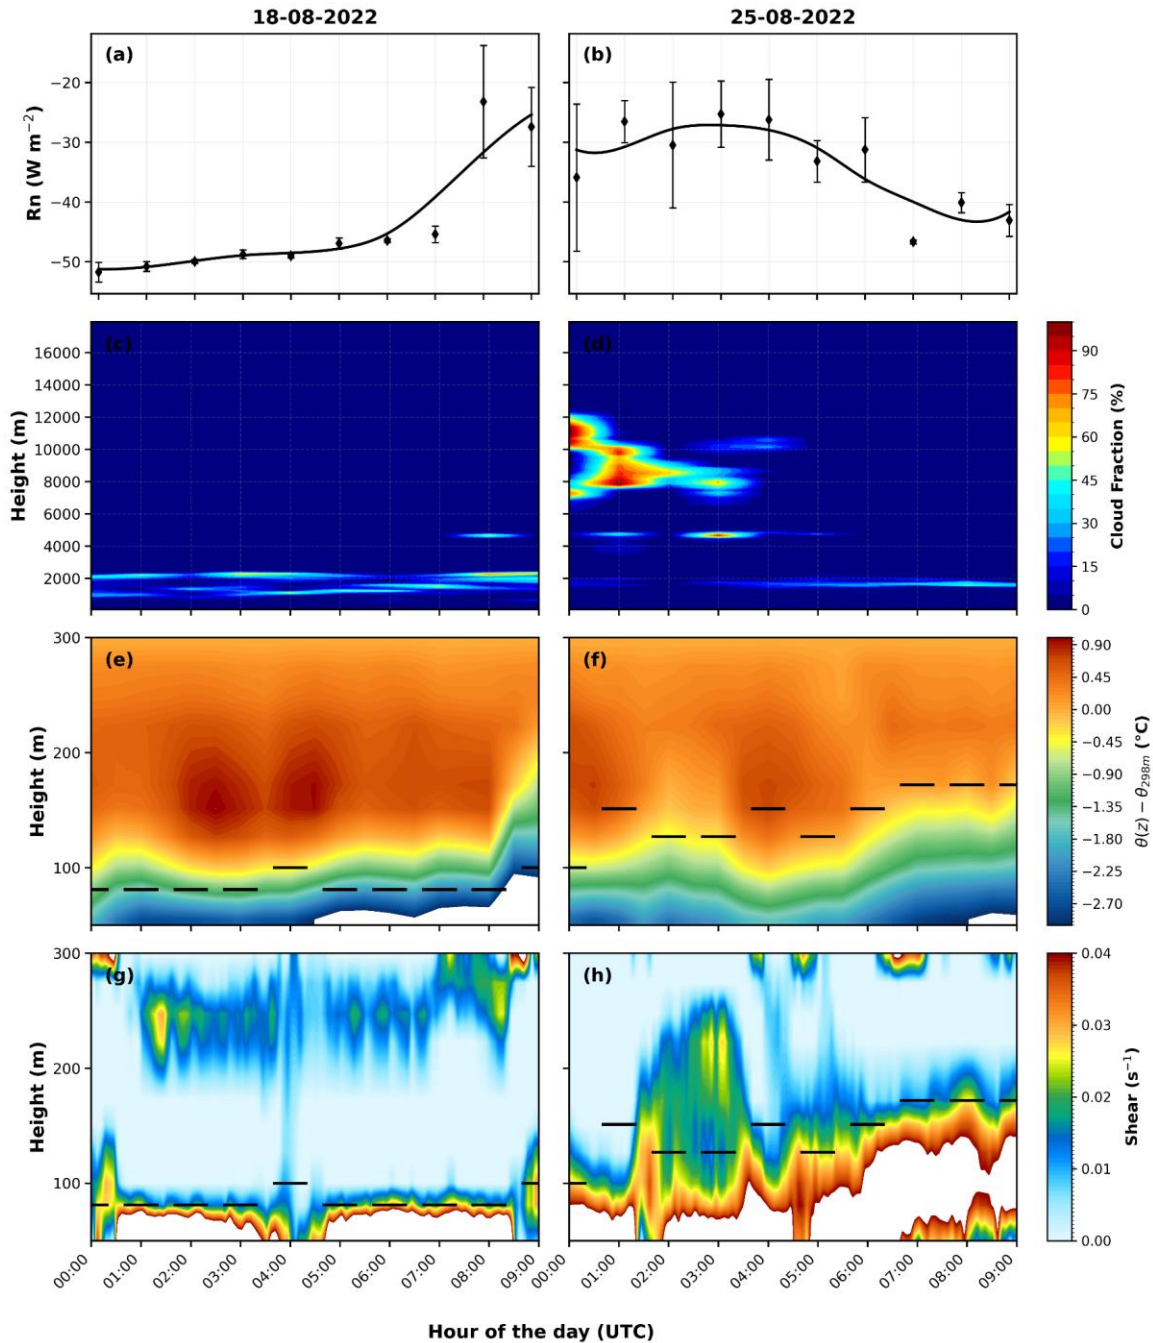

332  
 333 Figure 4 (Figure 9 in new version of the manuscript). Nocturnal evolution of (a, b) hourly mean  
 334 net radiation ( $R_n$ ) at 81 m ( $\pm$  standard deviation), (c, d) cloud fraction (%), (e, f) vertical  
 335 potential temperature ( $\theta$ ) difference from the value observed at 298 m, and (g, h) vertical wind  
 336 shear ( $dU/dz$ ) during the case-study nights of 18 August 2022 (left panels) and 25 August  
 337 2022 (right panels). Black horizontal segments indicate the estimated nocturnal boundary  
 338 layer height at each hour.  
 339  
 340

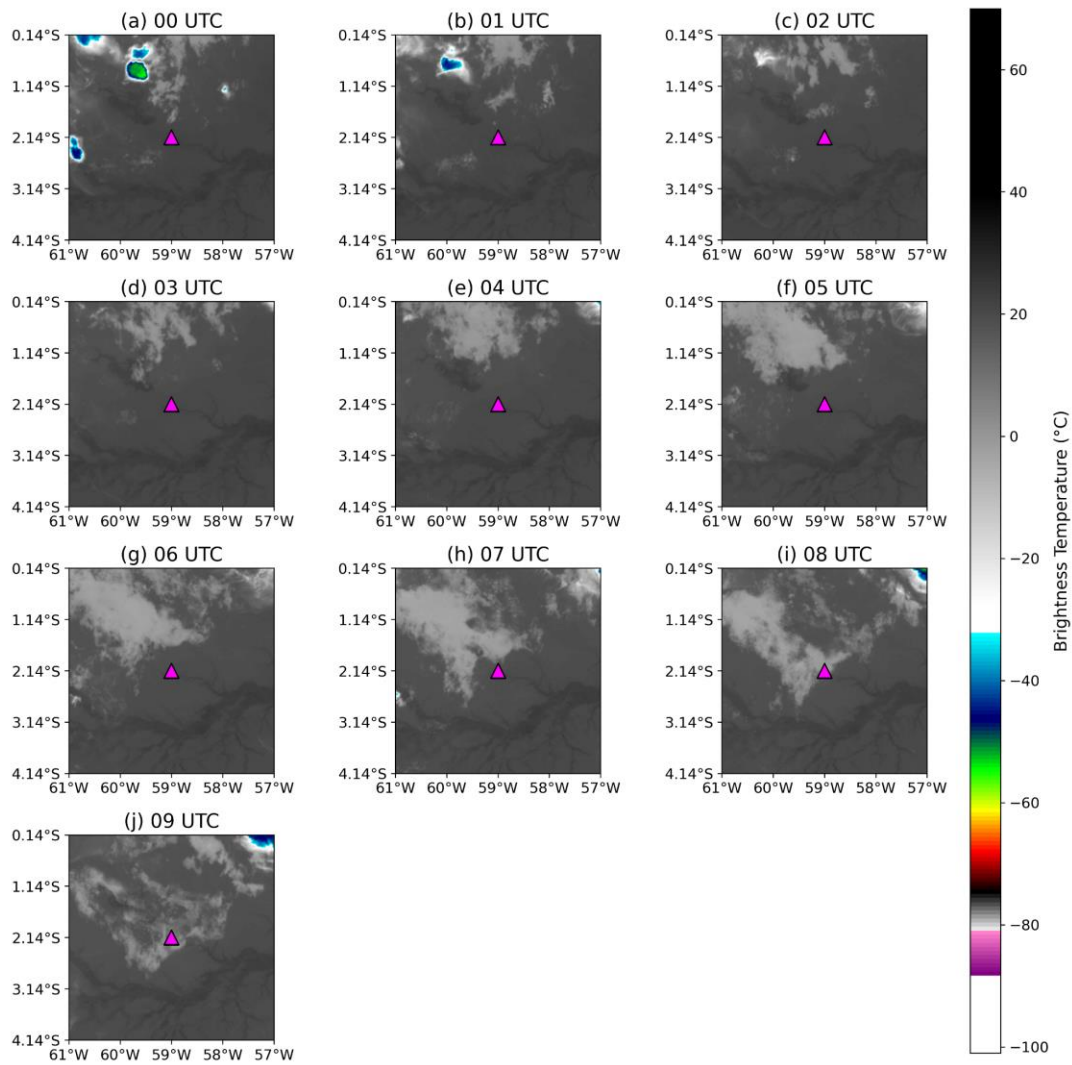

341  
 342  
 343  
 344  
 345

Figure 5 (Figure S2 in new version of the manuscript). GOES-16 IR Channel 13 (10.3  $\mu\text{m}$ ) brightness temperature over the ATTO site on 18 August 2022. Panels (a–j) show hourly images from 00 to 09 UTC. The magenta triangle marks the location of the ATTO tower.

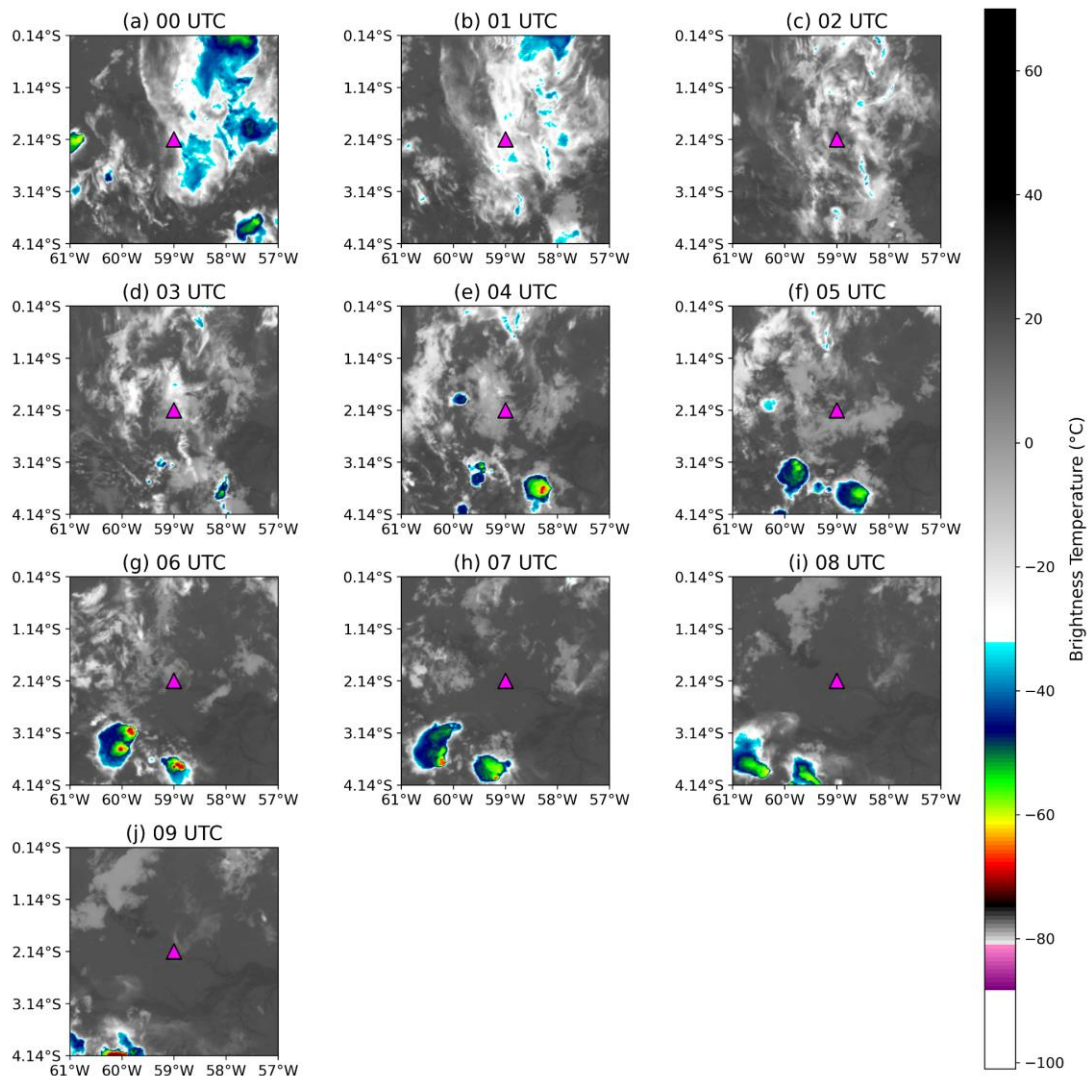

346  
 347 **Figure 6 (Figure S3 in new version of the manuscript). GOES-16 IR Channel 13 (10.3  $\mu\text{m}$ )**  
 348 **brightness temperature over the ATTO site on 25 August 2022. Panels (a–j) show hourly**  
 349 **images from 00 to 09 UTC. The magenta triangle marks the location of the ATTO tower.**

350  
 351 • Lines 178-184: The authors attribute the differences in nocturnal radiative loss and  
 352 boundary-layer structure primarily to variations in cloud cover (e.g., “greater cloud cover  
 353 results in greater turbulent activity”). While this mechanism is physically plausible from a  
 354 boundary-layer meteorology perspective, the manuscript does not present a direct metric of  
 355 cloud cover to support this interpretation. The analysis appears to rely on radiation  
 356 measurements (e.g., net radiation,  $R_n$ ), which can indeed reflect differences in radiative  
 357 cooling but do not uniquely indicate cloudiness. I therefore suggest that the authors either (i)  
 358 provide additional evidence linking the radiation differences to cloud cover (e.g., through  
 359 analysis of longwave radiation or another proxy for cloudiness), or (ii) rephrase the discussion  
 360 more cautiously, framing cloud cover as one possible explanation for the observed radiative  
 361 differences rather than a demonstrated cause.

362  
 363 We thank Reviewer #2 for this comment. We expanded the analysis of the two case-study  
 364 nights, as described in the response to the previous comment (Line 258-349 in this document).  
 365 These additional observations indicate lower (higher) cloud occurrence on 18 August 2022  
 366 (25 August 2022), consistent with the observed differences in net radiation between the two  
 367 cases.  
 368

369 • Line 185: Mention briefly these methods

370

371 This clarification has been incorporated into the new discussion section of the revised  
372 manuscript as follows:

373

374 L345-347: “Most previous studies relied on indirect methods based on thermodynamic profiles,  
375 Richardson number, or remote sensing approaches (Santos et al., 2007; Dias-Júnior et al.,  
376 2022; Carneiro et al., 2025).”

377

378 • Line 186: Based on which method?

379

380 This was already solved in previous comment (Line 78-79 in this document).

381

382 • Figure 8 does not differentiate between the 2 selected dates (add respectively in the  
383 caption).

384

385 We thank the reviewer for this suggestion. Figure 8 has been revised to include the respective  
386 dates in the figure titles and captions.

387

388 References:

389

390 Carneiro, R., Fisch, G., Neves, T., Santos, R., Santos, C., and Borges, C.: Nocturnal boundary layer  
391 erosion analysis in the Amazon using large-eddy simulation during GoAmazon project 2014/5,  
392 *Atmosphere*, 12, 240, 2021

393

394 Dias-Júnior, C. Q., Carneiro, R. G., Fisch, G., D’Oliveira, F. A. F., Sörgel, M., Botía, S., Machado, L. A.  
395 T., Wolff, S., Santos, R. M. N. d., and Pöhlker, C.: Intercomparison of planetary boundary layer heights  
396 using remote sensing retrievals and ERA5 reanalysis over Central Amazonia, *Remote Sensing*, 14,  
397 4561, 2022.

398

399 Dias, N. L., Toro, I. M. C., Dias-Júnior, C. Q., Mortarini, L., and Brondani, D.: The relaxed eddy  
400 accumulation method over the amazon forest: the importance of flux strength on individual and  
401 aggregated flux estimates, *Boundary-Layer Meteorology*, 189, 139–161, 2023.

402

403 Fisch, G., Tota, J., Machado, L., Silva Dias, M. A. F. d., Da F. Lyra, R., Nobre, C., Dolman, A., and  
404 Gash, J.: The convective boundary layer over pasture and forest in Amazonia, *Theoretical and Applied  
405 Climatology*, 78, 47–59, 2004

406

407 Foken, T., & Mauder, M. (2008). *Micrometeorology* (Vol. 2, p. 306). Berlin: Springer.

408

409 Huitema, A. C., de Feiter, V. S., González-Armas, R., Hartogensis, O. K., van Asperen, H., Quaresma  
410 Dias-Júnior, C., & Vilà-Guerau de Arellano, J. (2026). CO<sub>2</sub> and Heat exchange across the Nocturnal  
411 Canopy–Atmosphere interface in the Amazon rainforest. *EGUsphere*, 2026, 1-32.

412

413 Kaimal, Jagadish Chandran; FINNIGAN, John J. Atmospheric boundary layer flows: their structure and  
414 measurement. Oxford university press, 1994.

415

416 Lenschow, D. H., Li, X. S., Zhu, C. J., and Stankov, B. B.: The stably stratified boundary layer over the  
417 Great Plains: I. Mean and turbulence structure, *Boundary-layer meteorology*, 42, 95–121, 1988

418

419 Mendonça, A. C., Dias-Junior, C. Q., Acevedo, O. C., Marra, D. M., Cely-Toro, I. M., Fisch, G., Brondani,  
420 D. V., Manzi, A. O., Portela, B. T., Quesada, C. A., et al.: Estimation of the nocturnal boundary layer  
421 height over the Central Amazon forest using turbulence measurements, *Agricultural and Forest  
422 Meteorology*, 367, 110469, 2025

423

424 Nieuwstadt, Frans TM. The turbulent structure of the stable, nocturnal boundary layer. *Journal of  
425 Atmospheric Sciences*, v. 41, n. 14, p. 2202-2216, 1984.

426

427 Oliveira, P. E., Acevedo, O. C., Sörgel, M., Tsokankunku, A., Wolff, S., Araújo, A. C., ... & Andreae, M.  
428 O. (2018). Nighttime wind and scalar variability within and above an Amazonian canopy. *Atmospheric*  
429 *Chemistry and Physics*, 18(5), 3083-3099.  
430  
431 Starkenburg, D., Metzger, S., Fochesatto, G. J., Alfieri, J. G., Gens, R., Prakash, A., and Cristóbal, J.:  
432 Assessment of despiking methods for turbulence data in micrometeorology, *Journal of Atmospheric and*  
433 *Oceanic Technology*, 33, 2001–2013, 2016  
434  
435 Stull, R. B. (1988). Mean boundary layer characteristics. In *An introduction to boundary layer*  
436 *meteorology* (pp. 1-27). Dordrecht: Springer Netherlands.  
437  
438 Sun, J., Burns, S. P., Lenschow, D. H., Banta, R., Newsom, R., Coulter, R., ... & Hu, X. Z. (2002).  
439 Intermittent turbulence associated with a density current passage in the stable boundary layer.  
440 *Boundary-Layer Meteorology*, 105(2), 199-219.  
441  
442 Vickers, D. and Mahrt, L.: Quality control and flux sampling problems for tower and aircraft data, *Journal*  
443 *of atmospheric and oceanic technology*, 14, 512–526, 1997  
444  
445 Vickers, D., & Mahrt, L. (2004). Evaluating formulations of stable boundary layer height. *Journal of*  
446 *applied meteorology*, 43(11), 1736-1749.  
447  
448 Wilczak, J. M., Oncley, S. P., & Stage, S. A. (2001). Sonic anemometer tilt correction algorithms.  
449 *Boundary-layer meteorology*, 99(1), 127-150.  
450  
451 Zahn, E., Chor, T., and Dias, N.: A simple methodology for quality control of micrometeorological  
452 datasets, *Am J Environ Eng*, 6, 135–142, 2016
